# Supplementary material for: Haemolytic activity and cellular toxicity of SBA-15-type silicas: elucidating the role of the mesostructure, surface functionality and linker length
Source: Royal Society of Chemistry journal article supplement (doi:10.1039/c4tb01901f), 2015-01-01

# **Haemolytic activity and cellular toxicity of SBA-15-type silicas: Elucidating the role of the mesostructure, the surface functionality and the linker length**

Małgorzata Ferenc,<sup>a</sup> Nadia Katir,<sup>b</sup> Katarzyna Miłowska,<sup>a</sup> Mosto Bousmina,<sup>b,c</sup> Jean-Pierre Majoral,<sup>d</sup> Maria Bryszewska,<sup>a,\*</sup> Abdelkrim El Kadib.<sup>b,\*</sup>

<sup>a</sup> Department of General Biophysics, Faculty of Biology and Environmental Protection, University of Lodz, 141/143 Pomorska St., Lodz, Poland.

<sup>b</sup> Euromed Research Institute, Engineering Division, Euro-Mediterranean University of Fes (UEMF), Fès-Shore, Route de Sidi Hrazem, 30070 Fès, Morocco. [a.elkadib@ueuromed.org](mailto:a.elkadib@ueuromed.org).

<sup>c</sup> Hassan II Academy for Science and Technology.

<sup>d</sup> Laboratoire de Chimie de Coordination (LCC) CNRS, 205 route de Narbonne, 31077 Toulouse Cedex 4, (France)

**S1: SEM of functional silicates.**

**S2: Haemolytic activity of silica nanoparticles:  $\alpha$ -SiO<sub>2</sub>, SBA-15, SBA-SH, SBA-NH<sub>2</sub> and SBA-COOH.**

**S3: Haemoglobin adsorption studies.**

**S4: Haemolysis of functional silicates in absence and presence of HAS (t = 2h).**

**S1: SEM of functional silicates.**

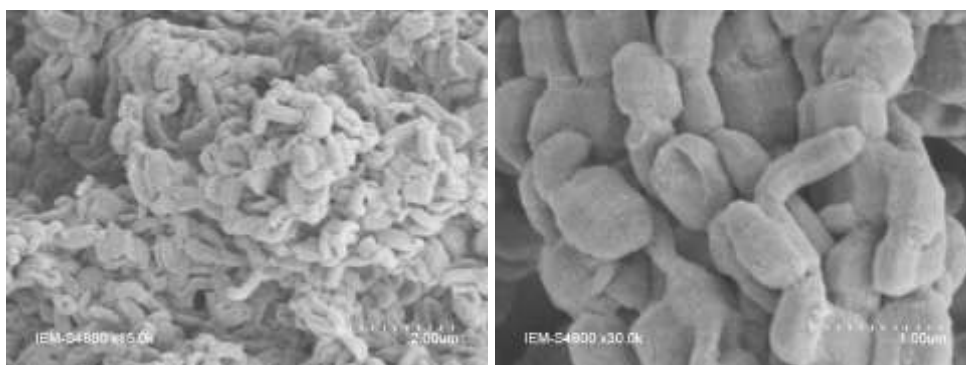

SEM photos of **SBA-NH<sub>2</sub>** [(scale bare left = 2  $\mu\text{m}$ ); (scale bare right: 1  $\mu\text{m}$ )].

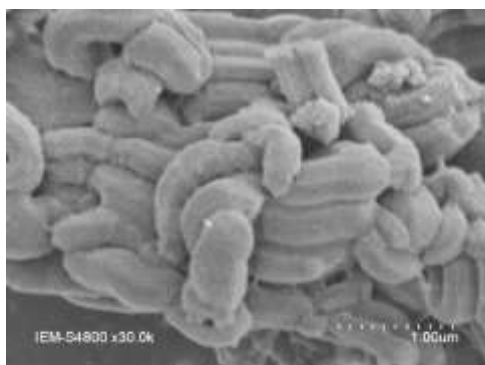

SEM photos of **SBA-SH** (scale bare =1  $\mu\text{m}$ ). Both of them showing the typical rod-like morphology of SBA-15-type materials.

## S2: Haemolytic activity of silica nanoparticles: $\alpha$ -SiO<sub>2</sub>, SBA-15, SBA-SH, SBA-NH<sub>2</sub> and SBA-COOH.

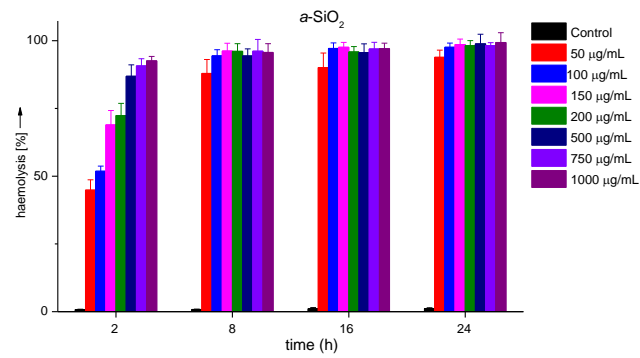

### Haemolytic activity of $\alpha$ -SiO<sub>2</sub>

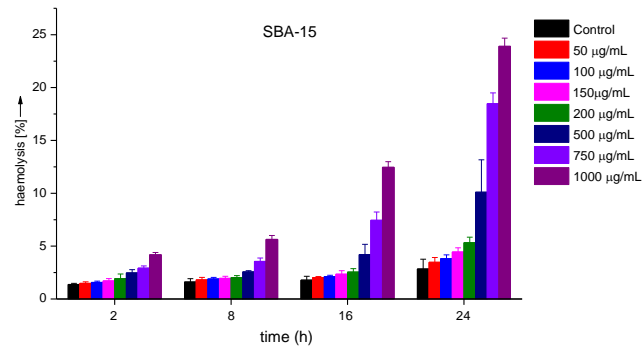

### Haemolytic activity of SBA-15

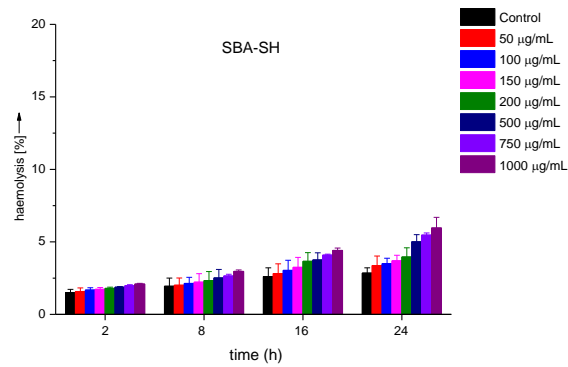

### Haemolytic activity of SBA-SH

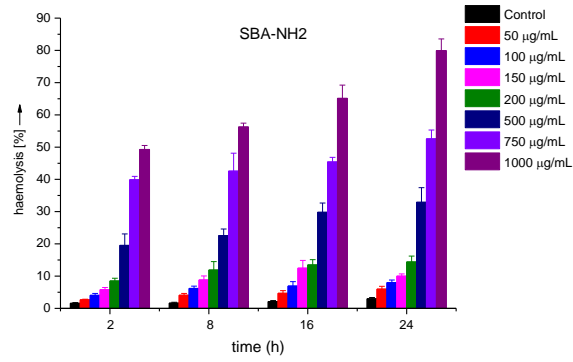

### Haemolytic activity of SBA-NH<sub>2</sub>

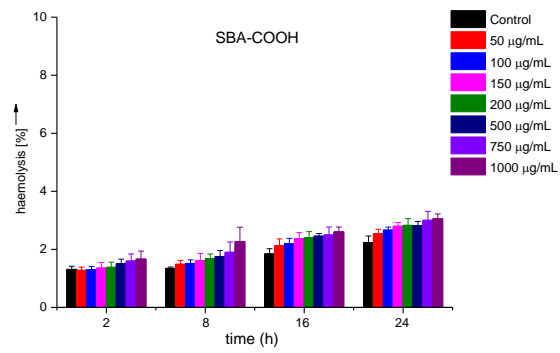

### Haemolytic activity of SBA-COOH

### S3: Haemoglobin adsorption studies.

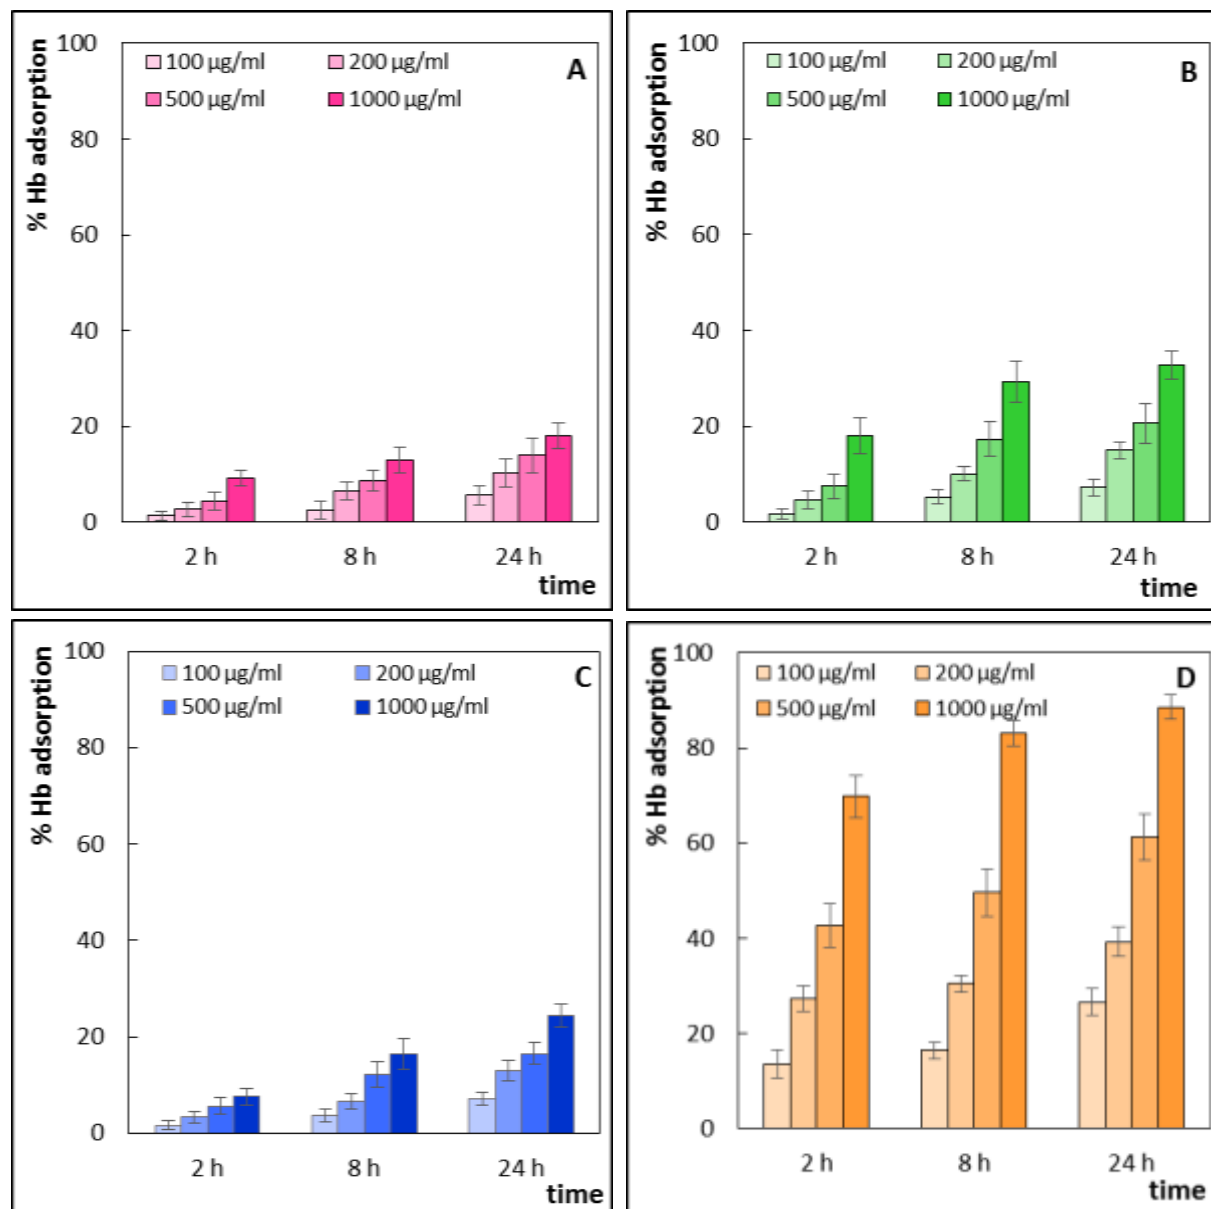

**Figure 1. The percentage of haemoglobin adsorption by silica nanoparticles: SBA-15 (A), SBA-SH (B), SBA-NH<sub>2</sub> (C) and SBA-COOH (D).**

**S4: Hemolysis of functional silicates in absence and presence of HAS (t = 2h).**

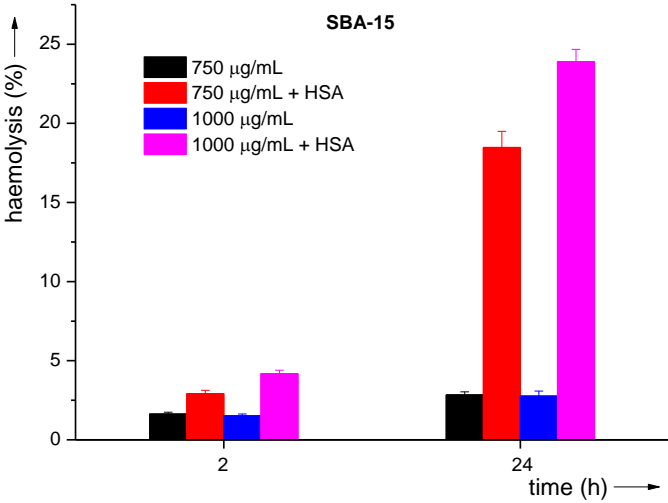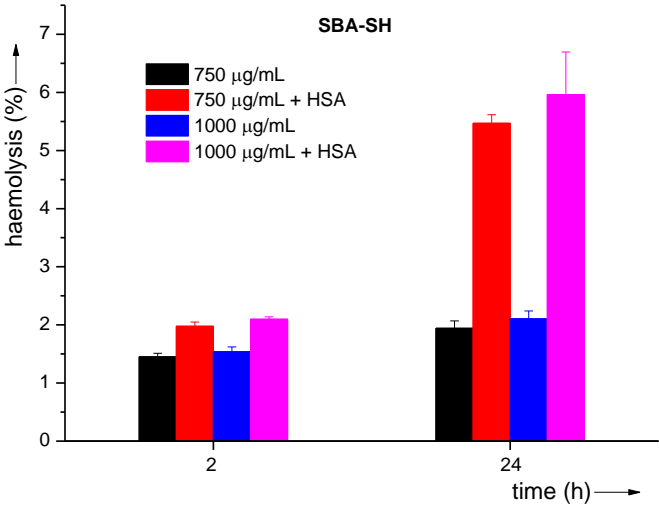

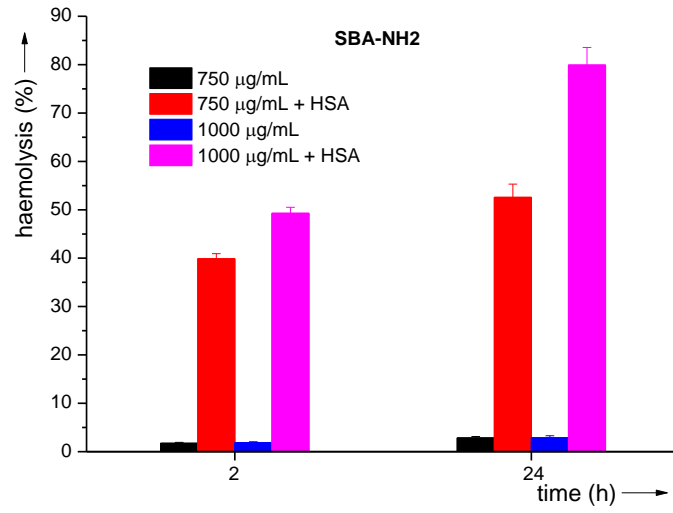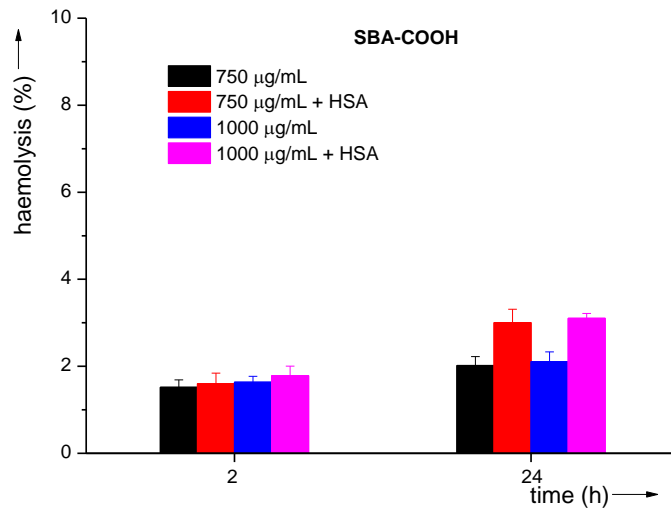

Supplement: c4tb01901f1.pdf [file c4tb01901f1.pdf]
